# Supplementary material for: Functional and evolutionary diversification of luciferase genes in Metridia lucens Boeck 1865
Source: Sci Rep. 2026 Jan 23;16:6032. doi: 10.1038/s41598-026-36319-2 (PMC12902078; doi:10.1038/s41598-026-36319-2)
Supplement: Supplementary file 4 — Supplementary Information 4. [file 41598_2026_36319_MOESM4_ESM.pdf]

Supplemental Table 4. Haplotype diversity for *MLuc1* from PCS (PCR-Cloning and Sanger sequencing) and MPS (Massive Parallel Sequencing) data.

[illegible]

Note: Plain text, silent or intron mutation; Bold, nonsynonymous mutation; Red, nonsense/frameshift mutation; \*, nonsense mutation (stop codon); Light grey, exon; dot, same as first sequence; -, deletion.
