# Supplementary material for: Functional and evolutionary diversification of luciferase genes in Metridia lucens Boeck 1865
Source: Sci Rep. 2026 Jan 23;16:6032. doi: 10.1038/s41598-026-36319-2 (PMC12902078; doi:10.1038/s41598-026-36319-2)
Supplement: Supplementary file 5 — Supplementary Information 5. [file 41598_2026_36319_MOESM5_ESM.pdf]

Supplemental Table 5. *MLuc2* haplotypes obtained by means of PCS (PCR-cloning and Sanger sequencing) and MPS (Massive Parallel Sequencing).

[illegible]

Note: Plain text, silent or intron mutation; Bold, nonsynonymous mutation; Red, nonsense \*/frameshift mutation; Light grey, exon; dot, same as first sequence; -, deletion.
