# Supplementary material for: Functional and evolutionary diversification of luciferase genes in Metridia lucens Boeck 1865
Source: Sci Rep. 2026 Jan 23;16:6032. doi: 10.1038/s41598-026-36319-2 (PMC12902078; doi:10.1038/s41598-026-36319-2)
Supplement: Supplementary file 6 — Supplementary Information 6. [file 41598_2026_36319_MOESM6_ESM.pdf]

[illegible]

Note: Plain text, silent or intron mutation; Bold, nonsynonymous mutation; Red, nonsense/frameshift mutation; \*, nonsense mutation (stop codon); Light grey, exon; dot, same as first sequence; -, deletion. Intron and exon boundaries for this region were difficult to determine, so all positions were considered as noncoding
